# Supplementary material for: Efficient and switchable production of bio-diol/triol chemicals from 5-hydroxymethylfurfural
Source: Royal Society of Chemistry journal article supplement (doi:10.1039/d4gc05875e), 2025-01-01
Supplement: d4gc05875e1.pdf [file d4gc05875e1.pdf]

## Supporting Information

### **Efficient and switchable production of bio-diol/triol chemicals from 5-hydroxymethylfurfural**

Armin Rezayan <sup>1,2</sup>, Dan Wu <sup>2</sup>, Zhen Zhang <sup>2</sup>, Xiaomeng Yang <sup>2</sup>, Renfeng Nie <sup>2</sup>, Tianliang Lu <sup>2</sup>, Jianshe Wang <sup>2</sup>, Xiaoqin Si <sup>2</sup>, Yongsheng Zhang <sup>2\*</sup>, Chunbao Xu <sup>1\*</sup>

<sup>1</sup> *School of Energy and Environment, City University of Hong Kong, Kowloon, Hong Kong SAR*

<sup>2</sup> *School of Chemical Engineering, Zhengzhou University, Zhengzhou 450001, China*

Corresponding authors: [yzhang@zzu.edu.cn](mailto:yzhang@zzu.edu.cn); [chunbaxu@cityu.edu.hk](mailto:chunbaxu@cityu.edu.hk)

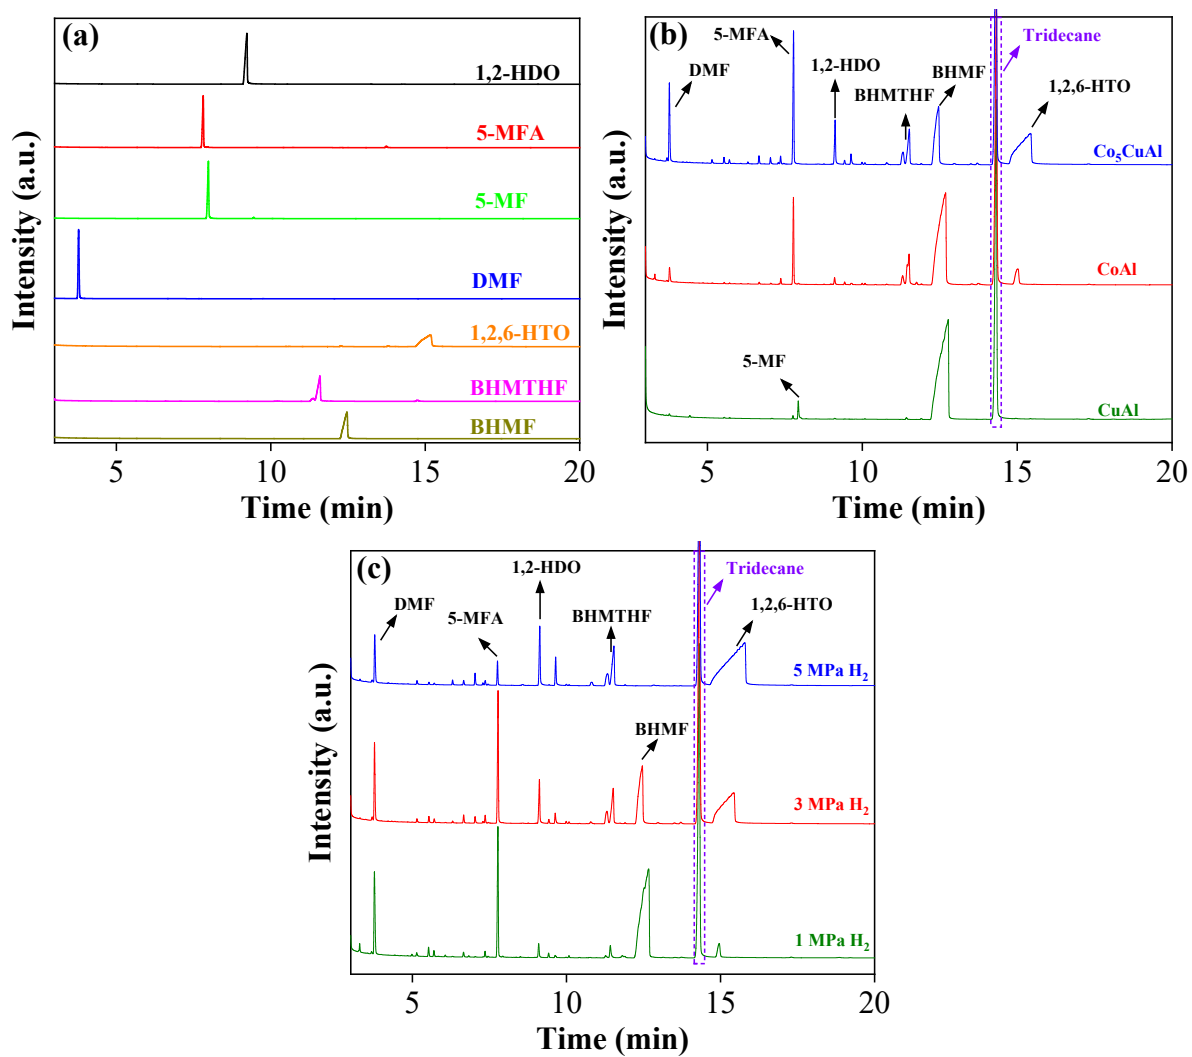

**Figure S1.** a) Standard samples' Peak identification using GC-MS. GC patterns of the samples under different conditions: b) 30 mg catalyst, 10 mL methanol, 1 mmol HMF, 120 °C, 3 h, 3 MPa H<sub>2</sub> c) 30 mg Co<sub>5</sub>CuAl, 10 mL methanol, 1 mmol HMF, 120 °C, 3 h

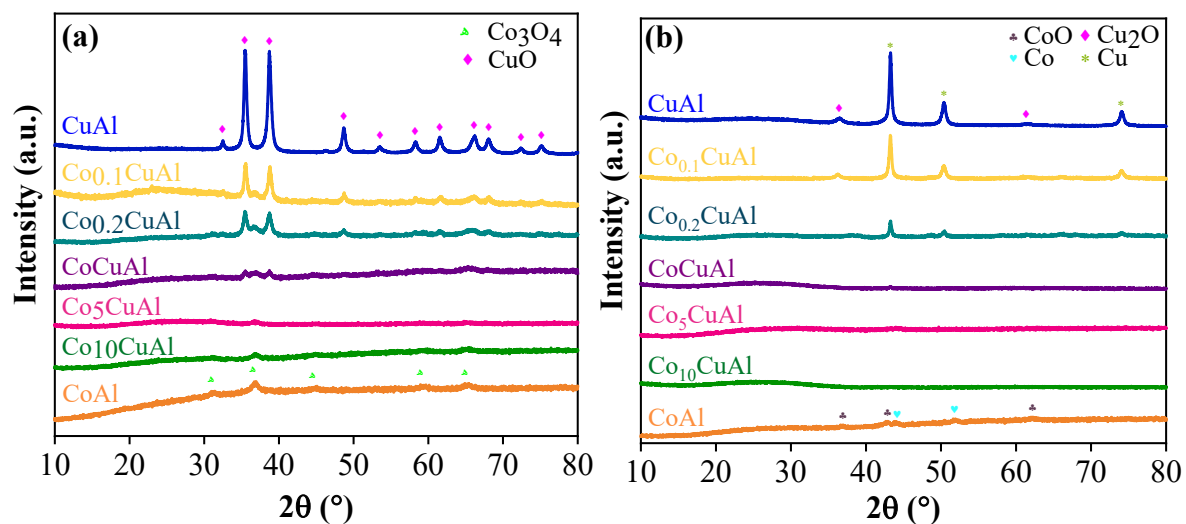

Figure S2. XRD patterns of LDOs catalysts (a) before reduction, and (b) after reduction.

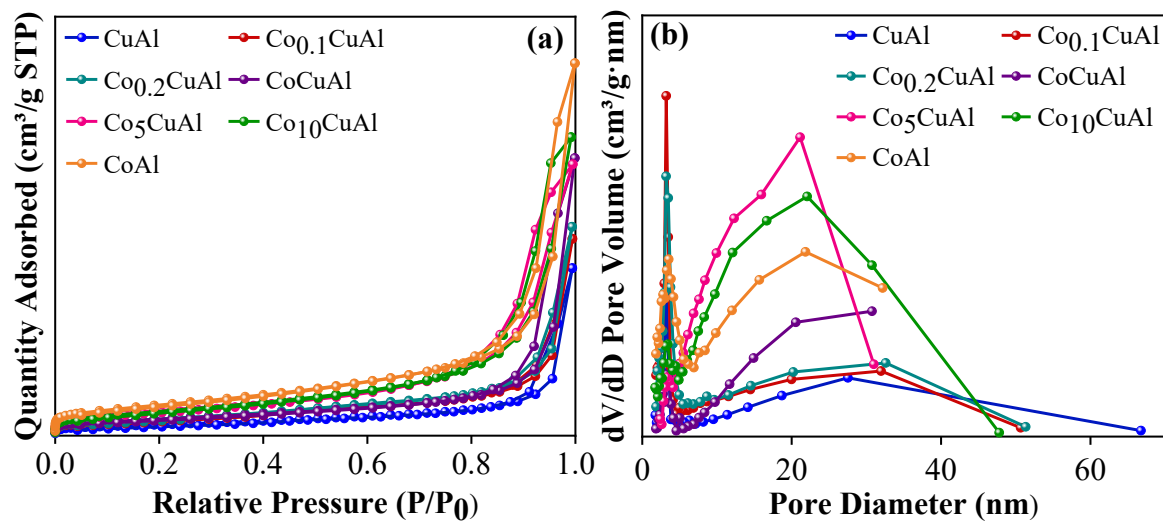

Figure S3. (a)  $N_2$  adsorption/desorption isotherm and (b) pore size distribution of reduced LDOs catalysts.

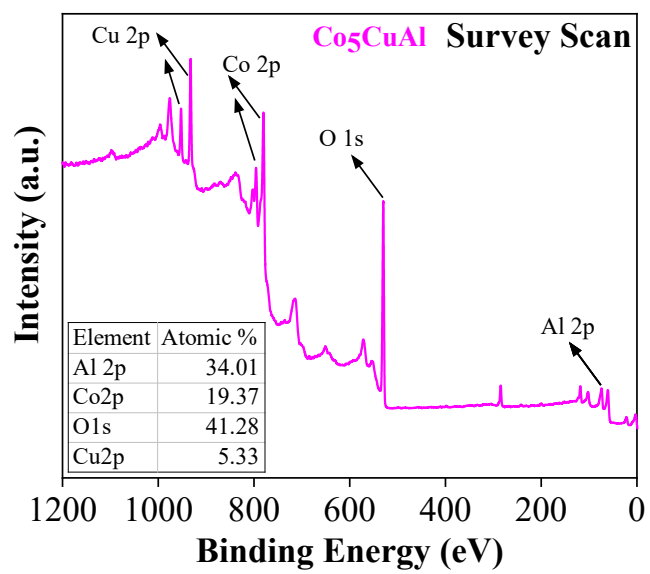

**Figure S4.** XPS survey and the atomic percentages of elements in the reduced Co<sub>5</sub>CuAl catalyst.

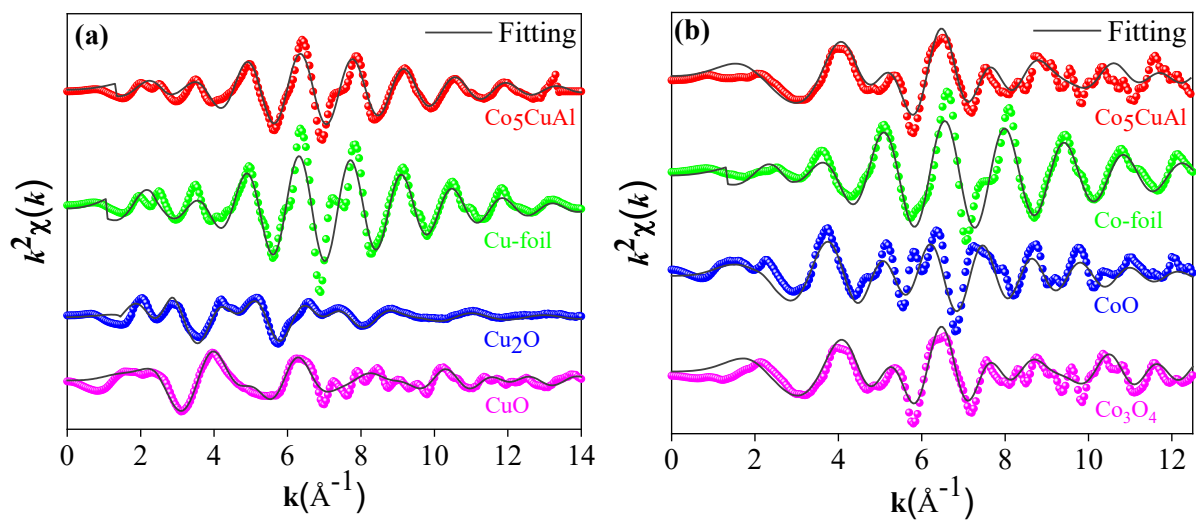

**Figure S5.** K space-fitting curves of  $\text{Co}_5\text{CuAl}$  and reference **(a)** Cu species **(b)** Co species.

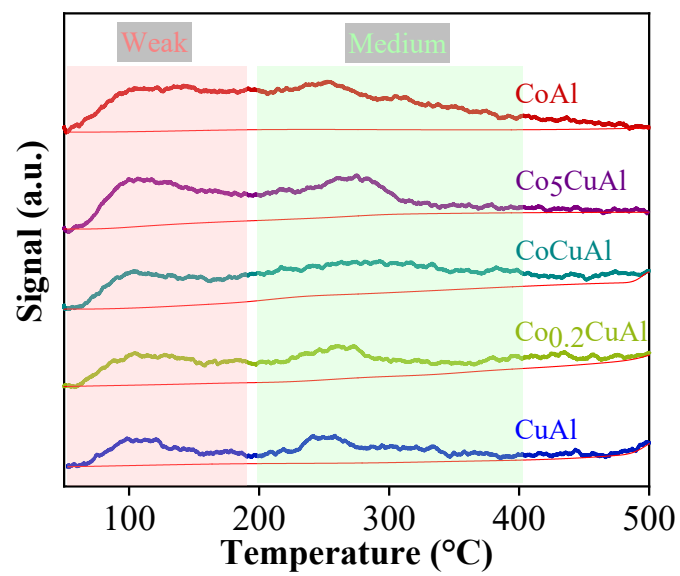

Figure S6. NH<sub>3</sub>-TPD patterns of reduced LDOs catalysts.

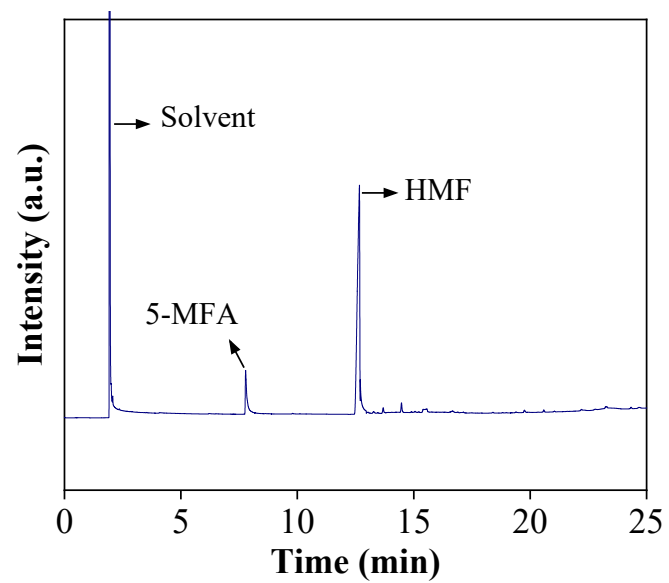

**Figure S7.** The GC pattern obtained for the sample under 3 MPa N<sub>2</sub> at 120°C for 3 h reaction.



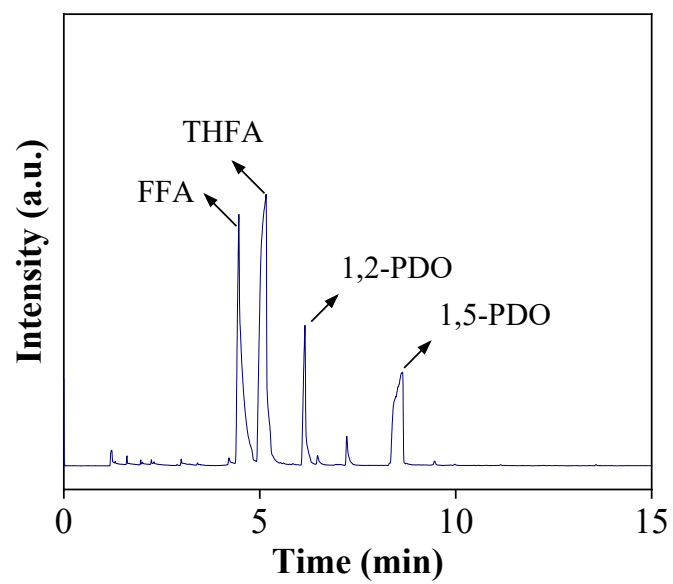

**Figure S8.** The GC pattern obtained for the sample under following reaction conditions: 1 mmol FF, 30 mg  $\text{Co}_5\text{CuAl}$ , 10 mL methanol, 3 h, 120°C, 5 MPa.

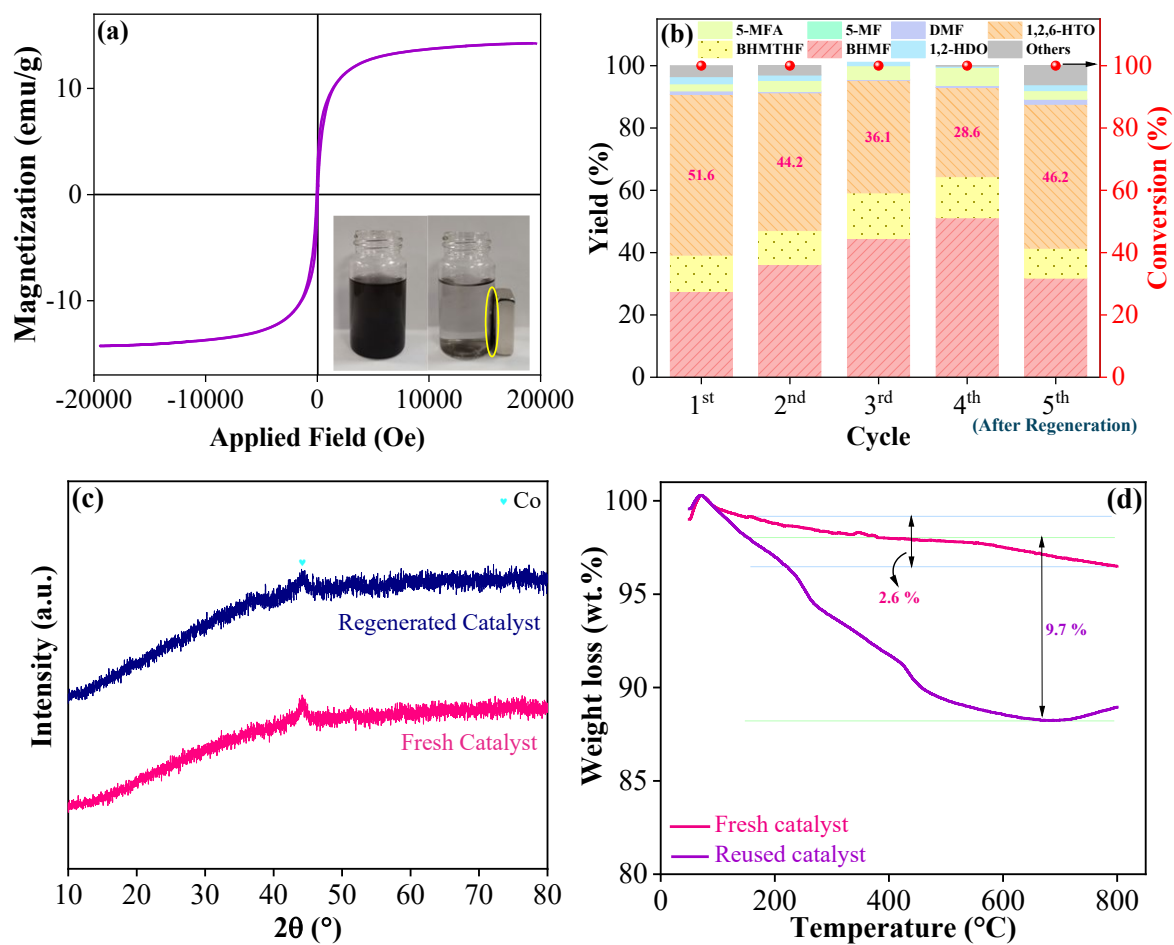

**Figure S9.** (a) VSM magnetization curve (b) Performance of the  $\text{Co}_5\text{CuAl}$  during five consecutive runs. Reaction conditions: 30 mg of  $\text{Co}_5\text{CuAl}$ , 10 mL methanol, 1 mmol HMF, 1 h, 120 °C, 4 MPa. (c) XRD patterns of the fresh and regenerated  $\text{Co}_5\text{CuAl}$  catalyst. (d) TGA analysis of fresh and spent catalysts.

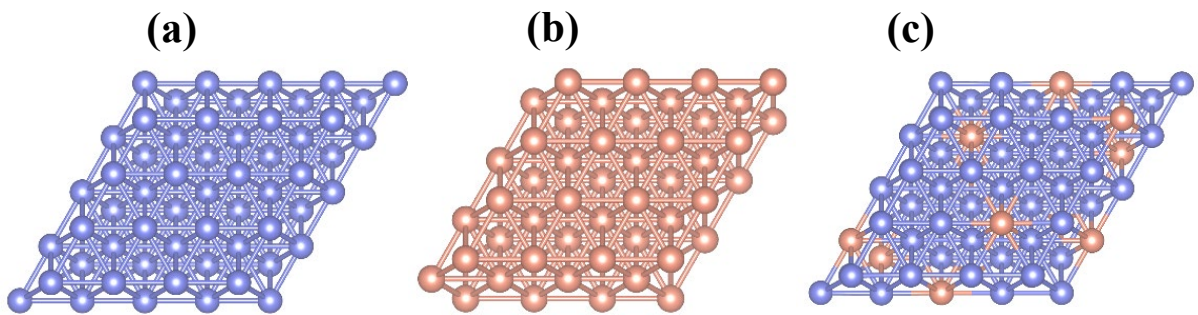

**Figure S10.** Constructed surfaces of **a)** Co(111), **b)** Cu(111), and **c)** CoCu(111) for the performed DFT computational calculations (Top-view).

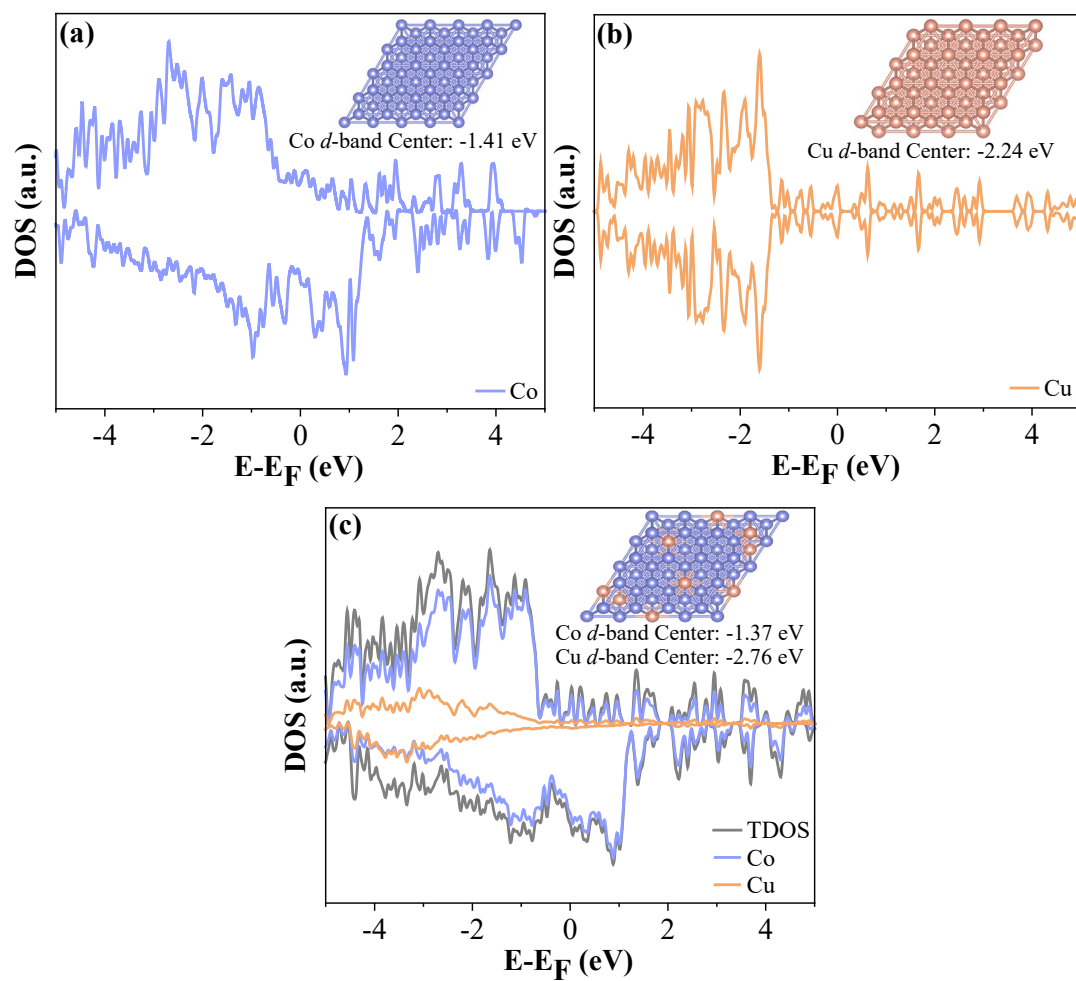

**Figure S11.** Calculated  $d$ -band center value for (a) Co(111) (b) Cu(111) and (c) CoCu(111) surfaces.

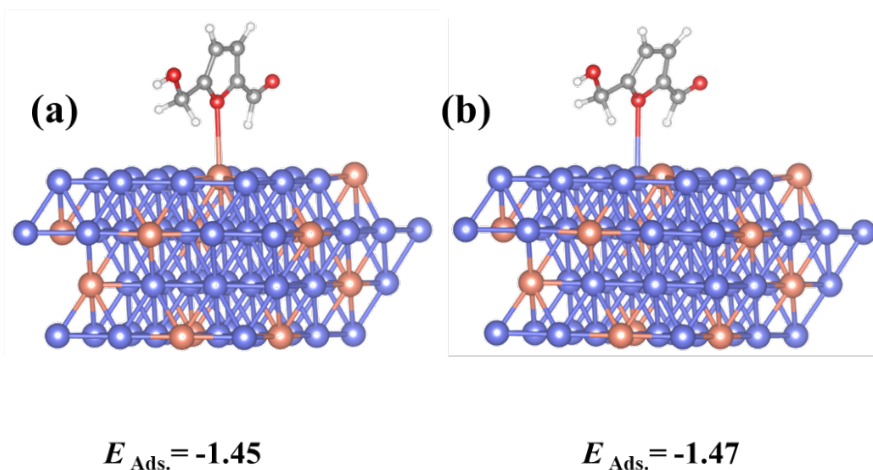

**Figure S12.** Adsorption energies of HMF *via* its furan ring on the (a) Cu of CoCu(111) and (b) Co of CoCu(111) surface. (Side-view; blue= Co; orange= Cu)

**Table S1.** Textual properties of reduced LDO catalysts.

| <b>Catalyst</b>             | <b>Total surface area<br/>(m<sup>2</sup>/g)</b> | <b>Total pores volume<br/>(cm<sup>3</sup>/g)</b> | <b>Average pores<br/>size (nm)</b> | <b>Cu*<br/>(nm)</b> | <b>Co*<br/>(nm)</b> | <b>CoO*<br/>(nm)</b> |
|-----------------------------|-------------------------------------------------|--------------------------------------------------|------------------------------------|---------------------|---------------------|----------------------|
| <b>CuAl</b>                 | 57                                              | 0.36                                             | 23.3                               | 26.3                | -                   | -                    |
| <b>Co<sub>0.1</sub>CuAl</b> | 70                                              | 0.39                                             | 18.4                               | 24.6                | -                   | -                    |
| <b>Co<sub>0.2</sub>CuAl</b> | 89                                              | 0.41                                             | 15.1                               | 21.8                | -                   | -                    |
| <b>Co<sub>1</sub>CuAl</b>   | 97                                              | 0.46                                             | 17.4                               | 19.2                | -                   | -                    |
| <b>Co<sub>5</sub>CuAl</b>   | 117                                             | 0.51                                             | 13.8                               | -                   | -                   | -                    |
| <b>Co<sub>10</sub>CuAl</b>  | 122                                             | 0.57                                             | 15.6                               | -                   | -                   | -                    |
| <b>CoAl</b>                 | 151                                             | 0.65                                             | 16.2                               | -                   | 18.8                | 17.6                 |

\* Measured by Scherrer equation

**Table S2.** EXAFS fitting parameters at the Cu K-edge for various samples ( $S_0^2=0.90$  from Cu-foil)

|                           | shell | CN*     | R( $\text{\AA}$ ) <sup>†</sup> | $\sigma^2$ ( $\text{\AA}^2$ ) <sup>‡</sup> | $\Delta E_0$ (eV) <sup>•</sup> | R factor |
|---------------------------|-------|---------|--------------------------------|--------------------------------------------|--------------------------------|----------|
| <b>Cu-foil</b>            | Cu-Cu | 12      | 2.54±0.01                      | 0.0088                                     | 4.5±0.5                        | 0.0027   |
|                           | Cu-O  | 2       | 1.85±0.01                      | 0.0031                                     |                                |          |
| <b>Cu<sub>2</sub>O</b>    | Cu-Cu | 12      | 3.02±0.01                      | 0.0220                                     | 7.7±0.8                        | 0.0086   |
|                           | Cu-O  | 6       | 3.53±0.04                      | 0.0211                                     |                                |          |
|                           | Cu-O  | 4       | 1.95±0.01                      | 0.0040                                     |                                |          |
|                           | Cu-O  | 2       | 2.74±0.04                      | 0.0108                                     |                                |          |
| <b>CuO</b>                | Cu-Cu | 4       | 2.89±0.01                      | 0.0049                                     | -0.2±0.9                       | 0.0078   |
|                           | Cu-Cu | 4       | 3.05±0.01                      | 0.0040                                     |                                |          |
|                           | Cu-Cu | 2       | 3.17±0.01                      | 0.0031                                     |                                |          |
| <b>Co<sub>5</sub>CuAl</b> | Cu-Co | 6.5±0.2 | 2.53±0.01                      | 0.0075                                     | 6.8±1.0                        | 0.0120   |

\* Coordination numbers; <sup>†</sup> Bond distance; <sup>‡</sup> Debye-Waller factors; <sup>•</sup> Inner potential correction. CN±20%; R ± 1%;  $\sigma^2 \pm 20\%$ .

**Table S3.** EXAFS fitting parameters at the Co K-edge for various samples ( $S_0^2=0.76$  from Co-foil)

|                                    | shell  | CN*     | R( $\text{\AA}$ ) <sup>†</sup> | $\sigma^2(\text{\AA}^2)$ <sup>‡</sup> | $\Delta E_0(\text{eV})$ <sup>♦</sup> | R factor |
|------------------------------------|--------|---------|--------------------------------|---------------------------------------|--------------------------------------|----------|
| <b>Co-foil</b>                     | Co-Co  | 12      | 2.49±0.01                      | 0.0063                                | 6.9±0.3                              | 0.0008   |
|                                    | Co-O   | 6       | 2.12±0.02                      | 0.0125                                | -3.1±0.7                             | 0.0066   |
| <b>CoO</b>                         | Co-Co  | 12      | 3.00±0.01                      | 0.0088                                |                                      |          |
|                                    | Co-O   | 5.3     | 1.91±0.02                      | 0.0034                                |                                      |          |
| <b>Co<sub>3</sub>O<sub>4</sub></b> | Co-Co1 | 4       | 2.85±0.01                      | 0.0035                                | -6.3±0.5                             | 0.0044   |
|                                    | Co-Co2 | 8       | 3.36±0.02                      | 0.0064                                |                                      |          |
|                                    | Co-O   | 5.1±0.5 | 1.87±0.01                      | 0.0041                                |                                      |          |
| <b>Co<sub>5</sub>CuAl</b>          | Co-Cu  | 1.0±0.2 | 2.51±0.01                      | 0.0140                                | -10.8±2.5                            | 0.0163   |
|                                    | Co-Co1 | 3.4±0.6 | 2.83±0.02                      | 0.0050                                |                                      |          |
|                                    | Co-Co2 | 8.4±1.2 | 3.32±0.02                      | 0.0086                                |                                      |          |

\* Coordination numbers; <sup>†</sup> Bond distance; <sup>‡</sup> Debye-Waller factors; <sup>♦</sup> Inner potential correction. CN±20%; R ± 1%;  $\sigma^2 \pm 20\%$ .



**Table S4.** Chemical properties of different catalysts.

| <b>Samples</b>              | <b>Acidity (mmol NH<sub>3</sub>/g)</b> |               |              |
|-----------------------------|----------------------------------------|---------------|--------------|
|                             | <b>Weak</b>                            | <b>Medium</b> | <b>Total</b> |
| <b>CuAl</b>                 | 0.12                                   | 0.14          | 0.26         |
| <b>Co<sub>0.2</sub>CuAl</b> | 0.17                                   | 0.16          | 0.33         |
| <b>CoCuAl</b>               | 0.18                                   | 0.26          | 0.44         |
| <b>Co<sub>5</sub>CuAl</b>   | 0.30                                   | 0.30          | 0.60         |
| <b>CoAl</b>                 | 0.31                                   | 0.43          | 0.74         |

**Table S5.** ICP results of the fresh and regenerated Co<sub>5</sub>CuAl catalyst.

| Catalyst    | Co (wt.%) | Cu (wt.%) | Al (wt.%) |
|-------------|-----------|-----------|-----------|
| Fresh       | 52.7      | 12.2      | 9.7       |
| Regenerated | 51.9      | 11.3      | 9.5       |
